# Supplementary material for: The effects of osmolytes on in vitro kinesin-microtubule motility assays
Source: Royal Society of Chemistry journal article supplement (doi:10.1039/d0ra08148e), 2020-01-01
Supplement: d0ra08148e1.pdf [file d0ra08148e1.pdf]

## SUPPORTING INFORMATION

### The effects of osmolytes on *in vitro* kinesin-microtubule motility assay

Virginia VanDelinder,<sup>a</sup> Ian Sickafoose,<sup>a</sup> Zachary I. Imam,<sup>a</sup> Randy Ko,<sup>a</sup> and George D. Bachand<sup>a\*</sup>

Center for Integrated Nanotechnologies, Sandia National Laboratories, Albuquerque, NM, USA. E-mail: gdbacha@sandia.gov

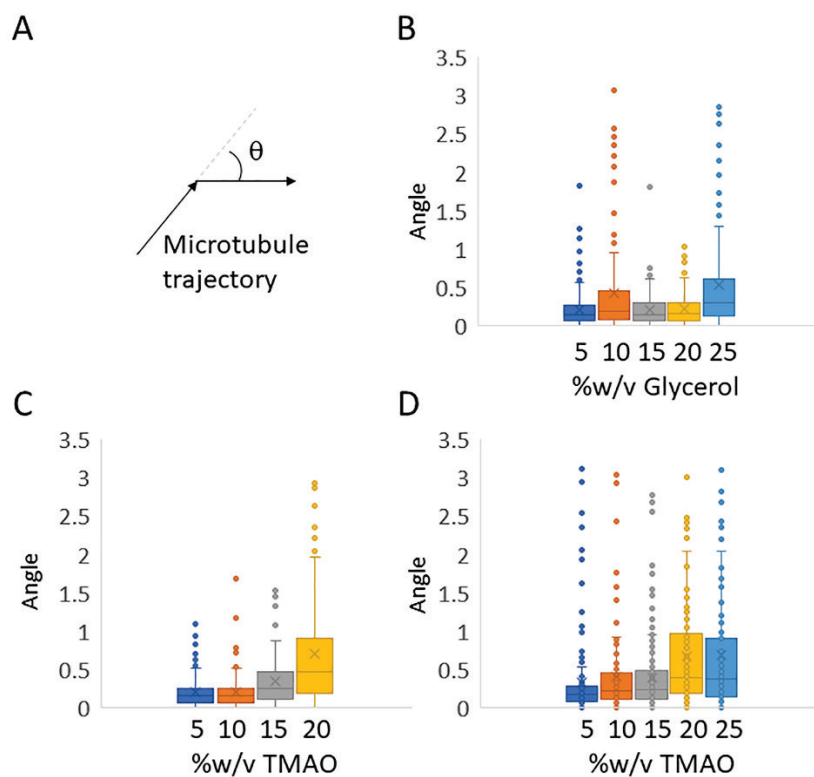

**Figure S1.** Angle of the leading tip of the microtubule along its trajectory. (A) Diagram showing the angle of the tip between successive frames that was calculated from the dot product of the tip trajectory. (B-D) Box plots of angle data for Glycerol, PEG, and TMAO, respectively.
